# Supplementary material for: Low field magnetic resonance imaging of the equine distal interphalangeal joint: Comparison between weight-bearing and non-weight-bearing conditions
Source: PLoS One. 2019 Jan 28;14(1):e0211101. doi: 10.1371/journal.pone.0211101 (PMC6349334; doi:10.1371/journal.pone.0211101)
Supplement: S2 Table — (CSV) [file pone.0211101.s002.csv]

S2 Dataset
Etude	Pied	Phal	Moment	Plan	Zone	Valeur
A	2	P2	AM	CM	dors	1,443333333
A	2	P2	AM	CM	centr	1,866666667
A	2	P2	AM	CM	palm	1,46
A	2	P2	AM	sag	dors	1,133333333
A	2	P2	AM	sag	centr	1,386666667
A	2	P2	AM	sag	palm	1,336666667
A	2	P2	AM	CL	dors	1,566666667
A	2	P2	AM	CL	centr	1,23
A	2	P2	AM	CL	palm	1,613333333
A	2	P2	PM	CM	dors	1,486666667
A	2	P2	PM	CM	centr	1,46
A	2	P2	PM	CM	palm	2,1
A	2	P2	PM	sag	dors	1,233333333
A	2	P2	PM	sag	centr	1,236666667
A	2	P2	PM	sag	palm	2,546666667
A	2	P2	PM	CL	dors	1,863333333
A	2	P2	PM	CL	centr	1,903333333
A	2	P2	PM	CL	palm	1,966666667
A	2	P3	AM	CM	dors	1,17
A	2	P3	AM	CM	centr	0,866666667
A	2	P3	AM	CM	palm	1,33
A	2	P3	AM	sag	dors	1,183333333
A	2	P3	AM	sag	centr	1,223333333
A	2	P3	AM	sag	palm	1,016666667
A	2	P3	AM	CL	dors	1,23
A	2	P3	AM	CL	centr	1,793333333
A	2	P3	AM	CL	palm	1,813333333
A	2	P3	PM	CM	dors	1,283333333
A	2	P3	PM	CM	centr	2,57
A	2	P3	PM	CM	palm	2,31
A	2	P3	PM	sag	dors	1,226666667
A	2	P3	PM	sag	centr	1,933333333
A	2	P3	PM	sag	palm	1,99
A	2	P3	PM	CL	dors	1,473333333
A	2	P3	PM	CL	centr	2,653333333
A	2	P3	PM	CL	palm	2,643333333
A	3	P2	AM	CM	dors	1,143333333
A	3	P2	AM	CM	centr	1,253333333
A	3	P2	AM	CM	palm	1,146666667
A	3	P2	AM	sag	dors	1,24
A	3	P2	AM	sag	centr	1,28
A	3	P2	AM	sag	palm	1,453333333
A	3	P2	AM	CL	dors	1,023333333
A	3	P2	AM	CL	centr	1,64
A	3	P2	AM	CL	palm	1,853333333
A	3	P2	PM	CM	dors	1,323333333
A	3	P2	PM	CM	centr	1,356666667
A	3	P2	PM	CM	palm	1,676666667
A	3	P2	PM	sag	dors	1,26
A	3	P2	PM	sag	centr	1,246666667
A	3	P2	PM	sag	palm	2,136666667
A	3	P2	PM	CL	dors	1,253333333
A	3	P2	PM	CL	centr	1,36
A	3	P2	PM	CL	palm	1,57
A	3	P3	AM	CM	dors	1,076666667
A	3	P3	AM	CM	centr	1,633333333
A	3	P3	AM	CM	palm	1,08
A	3	P3	AM	sag	dors	1,22
A	3	P3	AM	sag	centr	1,15
A	3	P3	AM	sag	palm	1,143333333
A	3	P3	AM	CL	dors	1,16
A	3	P3	AM	CL	centr	1,983333333
A	3	P3	AM	CL	palm	1,513333333
A	3	P3	PM	CM	dors	1,03
A	3	P3	PM	CM	centr	1,986666667
A	3	P3	PM	CM	palm	1,79
A	3	P3	PM	sag	dors	1,246666667
A	3	P3	PM	sag	centr	1,696666667
A	3	P3	PM	sag	palm	1,306666667
A	3	P3	PM	CL	dors	1,36
A	3	P3	PM	CL	centr	2,153333333
A	3	P3	PM	CL	palm	2,35
A	4	P2	AM	CM	dors	1,196666667
A	4	P2	AM	CM	centr	1,146666667
A	4	P2	AM	CM	palm	1,37
A	4	P2	AM	sag	dors	1,16
A	4	P2	AM	sag	centr	2,136666667
A	4	P2	AM	sag	palm	1,763333333
A	4	P2	AM	CL	dors	1,476666667
A	4	P2	AM	CL	centr	1,316666667
A	4	P2	AM	CL	palm	1,8
A	4	P2	PM	CM	dors	1,26
A	4	P2	PM	CM	centr	1,376666667
A	4	P2	PM	CM	palm	1,63
A	4	P2	PM	sag	dors	1,233333333
A	4	P2	PM	sag	centr	1,05
A	4	P2	PM	sag	palm	1,263333333
A	4	P2	PM	CL	dors	1,76
A	4	P2	PM	CL	centr	1,633333333
A	4	P2	PM	CL	palm	1,736666667
A	4	P3	AM	CM	dors	1,373333333
A	4	P3	AM	CM	centr	1,613333333
A	4	P3	AM	CM	palm	1,25
A	4	P3	AM	sag	dors	1,29
A	4	P3	AM	sag	centr	1,04
A	4	P3	AM	sag	palm	1,32
A	4	P3	AM	CL	dors	0,98
A	4	P3	AM	CL	centr	1,713333333
A	4	P3	AM	CL	palm	1,603333333
A	4	P3	PM	CM	dors	1,27
A	4	P3	PM	CM	centr	2,05
A	4	P3	PM	CM	palm	1,846666667
A	4	P3	PM	sag	dors	1,073333333
A	4	P3	PM	sag	centr	2,123333333
A	4	P3	PM	sag	palm	2,133333333
A	4	P3	PM	CL	dors	1,156666667
A	4	P3	PM	CL	centr	2,08
A	4	P3	PM	CL	palm	1,806666667
A	5	P2	AM	CM	dors	1,2
A	5	P2	AM	CM	centr	1,056666667
A	5	P2	AM	CM	palm	1,233333333
A	5	P2	AM	sag	dors	0,92
A	5	P2	AM	sag	centr	1,086666667
A	5	P2	AM	sag	palm	1,136666667
A	5	P2	AM	CL	dors	1,283333333
A	5	P2	AM	CL	centr	1,103333333
A	5	P2	AM	CL	palm	1,38
A	5	P2	PM	CM	dors	1,406666667
A	5	P2	PM	CM	centr	1,386666667
A	5	P2	PM	CM	palm	1,673333333
A	5	P2	PM	sag	dors	0,966666667
A	5	P2	PM	sag	centr	1,27
A	5	P2	PM	sag	palm	1,386666667
A	5	P2	PM	CL	dors	1,326666667
A	5	P2	PM	CL	centr	1,586666667
A	5	P2	PM	CL	palm	1,626666667
A	5	P3	AM	CM	dors	0,993333333
A	5	P3	AM	CM	centr	1,616666667
A	5	P3	AM	CM	palm	1,283333333
A	5	P3	AM	sag	dors	1,036666667
A	5	P3	AM	sag	centr	1,436666667
A	5	P3	AM	sag	palm	1,09
A	5	P3	AM	CL	dors	1,14
A	5	P3	AM	CL	centr	1,7
A	5	P3	AM	CL	palm	1,283333333
A	5	P3	PM	CM	dors	1,13
A	5	P3	PM	CM	centr	2,206666667
A	5	P3	PM	CM	palm	2,213333333
A	5	P3	PM	sag	dors	0,99
A	5	P3	PM	sag	centr	1,593333333
A	5	P3	PM	sag	palm	1,68
A	5	P3	PM	CL	dors	1,013333333
A	5	P3	PM	CL	centr	1,706666667
A	5	P3	PM	CL	palm	1,92
A	6	P2	AM	CM	dors	1,16
A	6	P2	AM	CM	centr	1,203333333
A	6	P2	AM	CM	palm	1,38
A	6	P2	AM	sag	dors	1,123333333
A	6	P2	AM	sag	centr	1,256666667
A	6	P2	AM	sag	palm	1,29
A	6	P2	AM	CL	dors	1,37
A	6	P2	AM	CL	centr	1,08
A	6	P2	AM	CL	palm	1,383333333
A	6	P2	PM	CM	dors	1,133333333
A	6	P2	PM	CM	centr	1,156666667
A	6	P2	PM	CM	palm	1,333333333
A	6	P2	PM	sag	dors	0,976666667
A	6	P2	PM	sag	centr	1,133333333
A	6	P2	PM	sag	palm	1,53
A	6	P2	PM	CL	dors	1,286666667
A	6	P2	PM	CL	centr	1,41
A	6	P2	PM	CL	palm	1,38
A	6	P3	AM	CM	dors	1,053333333
A	6	P3	AM	CM	centr	1,063333333
A	6	P3	AM	CM	palm	1,186666667
A	6	P3	AM	sag	dors	1,196666667
A	6	P3	AM	sag	centr	1,133333333
A	6	P3	AM	sag	palm	1,323333333
A	6	P3	AM	CL	dors	0,953333333
A	6	P3	AM	CL	centr	1,256666667
A	6	P3	AM	CL	palm	1,083333333
A	6	P3	PM	CM	dors	0,95
A	6	P3	PM	CM	centr	2,013333333
A	6	P3	PM	CM	palm	1,72
A	6	P3	PM	sag	dors	1,113333333
A	6	P3	PM	sag	centr	1,776666667
A	6	P3	PM	sag	palm	1,476666667
A	6	P3	PM	CL	dors	1,153333333
A	6	P3	PM	CL	centr	2,243333333
A	6	P3	PM	CL	palm	1,923333333
A	7	P2	AM	CM	dors	1,046666667
A	7	P2	AM	CM	centr	0,996666667
A	7	P2	AM	CM	palm	1,293333333
A	7	P2	AM	sag	dors	1,123333333
A	7	P2	AM	sag	centr	1,15
A	7	P2	AM	sag	palm	1,146666667
A	7	P2	AM	CL	dors	1,063333333
A	7	P2	AM	CL	centr	1,123333333
A	7	P2	AM	CL	palm	1,366666667
A	7	P2	PM	CM	dors	1,02
A	7	P2	PM	CM	centr	1,106666667
A	7	P2	PM	CM	palm	1,366666667
A	7	P2	PM	sag	dors	0,883333333
A	7	P2	PM	sag	centr	0,943333333
A	7	P2	PM	sag	palm	1,293333333
A	7	P2	PM	CL	dors	0,993333333
A	7	P2	PM	CL	centr	1,133333333
A	7	P2	PM	CL	palm	1,38
A	7	P3	AM	CM	dors	0,863333333
A	7	P3	AM	CM	centr	1,023333333
A	7	P3	AM	CM	palm	1,403333333
A	7	P3	AM	sag	dors	1,06
A	7	P3	AM	sag	centr	0,71
A	7	P3	AM	sag	palm	1,11
A	7	P3	AM	CL	dors	0,843333333
A	7	P3	AM	CL	centr	1,19
A	7	P3	AM	CL	palm	1,183333333
A	7	P3	PM	CM	dors	0,88
A	7	P3	PM	CM	centr	1,276666667
A	7	P3	PM	CM	palm	1,11
A	7	P3	PM	sag	dors	1,063333333
A	7	P3	PM	sag	centr	0,98
A	7	P3	PM	sag	palm	1,263333333
A	7	P3	PM	CL	dors	0,883333333
A	7	P3	PM	CL	centr	1,493333333
A	7	P3	PM	CL	palm	1,48
A	8	P2	AM	CM	dors	1,08
A	8	P2	AM	CM	centr	1,073333333
A	8	P2	AM	CM	palm	1,33
A	8	P2	AM	sag	dors	1,173333333
A	8	P2	AM	sag	centr	1,29
A	8	P2	AM	sag	palm	1,403333333
A	8	P2	AM	CL	dors	1,18
A	8	P2	AM	CL	centr	1,29
A	8	P2	AM	CL	palm	1,263333333
A	8	P2	PM	CM	dors	1,16
A	8	P2	PM	CM	centr	1,176666667
A	8	P2	PM	CM	palm	1,416666667
A	8	P2	PM	sag	dors	1,163333333
A	8	P2	PM	sag	centr	1,256666667
A	8	P2	PM	sag	palm	1,44
A	8	P2	PM	CL	dors	1,053333333
A	8	P2	PM	CL	centr	1,206666667
A	8	P2	PM	CL	palm	1,403333333
A	8	P3	AM	CM	dors	0,853333333
A	8	P3	AM	CM	centr	0,843333333
A	8	P3	AM	CM	palm	1,263333333
A	8	P3	AM	sag	dors	1,053333333
A	8	P3	AM	sag	centr	1,016666667
A	8	P3	AM	sag	palm	1,366666667
A	8	P3	AM	CL	dors	1,19
A	8	P3	AM	CL	centr	1,386666667
A	8	P3	AM	CL	palm	1,336666667
A	8	P3	PM	CM	dors	0,9
A	8	P3	PM	CM	centr	1,556666667
A	8	P3	PM	CM	palm	1,3
A	8	P3	PM	sag	dors	1,083333333
A	8	P3	PM	sag	centr	1,056666667
A	8	P3	PM	sag	palm	1,44
A	8	P3	PM	CL	dors	1,096666667
A	8	P3	PM	CL	centr	1,69
A	8	P3	PM	CL	palm	1,44
A	9	P2	AM	CM	dors	0,903333333
A	9	P2	AM	CM	centr	1,093333333
A	9	P2	AM	CM	palm	1,123333333
A	9	P2	AM	sag	dors	1,44
A	9	P2	AM	sag	centr	1,19
A	9	P2	AM	sag	palm	1,136666667
A	9	P2	AM	CL	dors	1,113333333
A	9	P2	AM	CL	centr	1,223333333
A	9	P2	AM	CL	palm	1,426666667
A	9	P2	PM	CM	dors	1,146666667
A	9	P2	PM	CM	centr	1,176666667
A	9	P2	PM	CM	palm	1,286666667
A	9	P2	PM	sag	dors	1,273333333
A	9	P2	PM	sag	centr	1,29
A	9	P2	PM	sag	palm	1,32
A	9	P2	PM	CL	dors	1,11
A	9	P2	PM	CL	centr	1,273333333
A	9	P2	PM	CL	palm	1,053333333
A	9	P3	AM	CM	dors	1,13
A	9	P3	AM	CM	centr	0,98
A	9	P3	AM	CM	palm	1,086666667
A	9	P3	AM	sag	dors	0
A	9	P3	AM	sag	centr	1,073333333
A	9	P3	AM	sag	palm	1,12
A	9	P3	AM	CL	dors	0,973333333
A	9	P3	AM	CL	centr	1,053333333
A	9	P3	AM	CL	palm	0,966666667
A	9	P3	PM	CM	dors	0,903333333
A	9	P3	PM	CM	centr	1,473333333
A	9	P3	PM	CM	palm	1,39
A	9	P3	PM	sag	dors	0,4
A	9	P3	PM	sag	centr	1,37
A	9	P3	PM	sag	palm	1,2
A	9	P3	PM	CL	dors	0,88
A	9	P3	PM	CL	centr	1,453333333
A	9	P3	PM	CL	palm	1,273333333
A	10	P2	AM	CM	dors	1,086666667
A	10	P2	AM	CM	centr	1,23
A	10	P2	AM	CM	palm	1,06
A	10	P2	AM	sag	dors	1,2
A	10	P2	AM	sag	centr	1,42
A	10	P2	AM	sag	palm	1,226666667
A	10	P2	AM	CL	dors	0,713333333
A	10	P2	AM	CL	centr	1,436666667
A	10	P2	AM	CL	palm	1,243333333
A	10	P2	PM	CM	dors	1,236666667
A	10	P2	PM	CM	centr	1,066666667
A	10	P2	PM	CM	palm	1,186666667
A	10	P2	PM	sag	dors	0,856666667
A	10	P2	PM	sag	centr	1,04
A	10	P2	PM	sag	palm	1,376666667
A	10	P2	PM	CL	dors	1,06
A	10	P2	PM	CL	centr	1,216666667
A	10	P2	PM	CL	palm	1,286666667
A	10	P3	AM	CM	dors	1,063333333
A	10	P3	AM	CM	centr	0,93
A	10	P3	AM	CM	palm	1,16
A	10	P3	AM	sag	dors	1,09
A	10	P3	AM	sag	centr	1,156666667
A	10	P3	AM	sag	palm	1,23
A	10	P3	AM	CL	dors	1,483333333
A	10	P3	AM	CL	centr	1,073333333
A	10	P3	AM	CL	palm	1,36
A	10	P3	PM	CM	dors	1,066666667
A	10	P3	PM	CM	centr	1,066666667
A	10	P3	PM	CM	palm	1,14
A	10	P3	PM	sag	dors	0,796666667
A	10	P3	PM	sag	centr	1,376666667
A	10	P3	PM	sag	palm	1,03
A	10	P3	PM	CL	dors	1,063333333
A	10	P3	PM	CL	centr	1,713333333
A	10	P3	PM	CL	palm	1,633333333
B	2	P2	AM	CM	-	45,94666667
B	2	P2	AM	sag	-	33,87
B	2	P2	AM	CL	-	31,03
B	2	P2	PM	CM	-	43,83333333
B	2	P2	PM	sag	-	43,87
B	2	P2	PM	CL	-	41,11333333
B	2	P3	AM	CM	-	42,77333333
B	2	P3	AM	sag	-	32,1
B	2	P3	AM	CL	-	44,91666667
B	2	P3	PM	CM	-	57,79333333
B	2	P3	PM	sag	-	46,18333333
B	2	P3	PM	CL	-	56,14
B	3	P2	AM	CM	-	32,88333333
B	3	P2	AM	sag	-	33,32
B	3	P2	AM	CL	-	41,37
B	3	P2	PM	CM	-	32,98
B	3	P2	PM	sag	-	36,92333333
B	3	P2	PM	CL	-	28,74
B	3	P3	AM	CM	-	33,03333333
B	3	P3	AM	sag	-	32,14666667
B	3	P3	AM	CL	-	40,23333333
B	3	P3	PM	CM	-	44,06333333
B	3	P3	PM	sag	-	31,39666667
B	3	P3	PM	CL	-	45,32
B	4	P2	AM	CM	-	35,72333333
B	4	P2	AM	sag	-	35,02333333
B	4	P2	AM	CL	-	29,71
B	4	P2	PM	CM	-	31,19333333
B	4	P2	PM	sag	-	25,97333333
B	4	P2	PM	CL	-	34,79333333
B	4	P3	AM	CM	-	32,63333333
B	4	P3	AM	sag	-	30,37
B	4	P3	AM	CL	-	38,48666667
B	4	P3	PM	CM	-	48,86333333
B	4	P3	PM	sag	-	45,00666667
B	4	P3	PM	CL	-	37,91666667
B	5	P2	AM	CM	-	27,12333333
B	5	P2	AM	sag	-	25,44333333
B	5	P2	AM	CL	-	28,92
B	5	P2	PM	CM	-	32,52666667
B	5	P2	PM	sag	-	24,68666667
B	5	P2	PM	CL	-	34,14333333
B	5	P3	AM	CM	-	34,8
B	5	P3	AM	sag	-	29,24666667
B	5	P3	AM	CL	-	35,22
B	5	P3	PM	CM	-	49,02
B	5	P3	PM	sag	-	40,85666667
B	5	P3	PM	CL	-	40,69333333
B	6	P2	AM	CM	-	29,72
B	6	P2	AM	sag	-	24,02333333
B	6	P2	AM	CL	-	26,83
B	6	P2	PM	CM	-	32,98666667
B	6	P2	PM	sag	-	28,26666667
B	6	P2	PM	CL	-	30,63
B	6	P3	AM	CM	-	30,65
B	6	P3	AM	sag	-	31,38333333
B	6	P3	AM	CL	-	30,55333333
B	6	P3	PM	CM	-	41,96333333
B	6	P3	PM	sag	-	39,09333333
B	6	P3	PM	CL	-	44,90666667
B	7	P2	AM	CM	-	20,79333333
B	7	P2	AM	sag	-	20,28
B	7	P2	AM	CL	-	22,19
B	7	P2	PM	CM	-	22,63333333
B	7	P2	PM	sag	-	23,03666667
B	7	P2	PM	CL	-	22,70333333
B	7	P3	AM	CM	-	24,10333333
B	7	P3	AM	sag	-	22,67
B	7	P3	AM	CL	-	25,13
B	7	P3	PM	CM	-	26,60333333
B	7	P3	PM	sag	-	26,67
B	7	P3	PM	CL	-	29,24666667
B	8	P2	AM	CM	-	25,86666667
B	8	P2	AM	sag	-	28,58666667
B	8	P2	AM	CL	-	24,98666667
B	8	P2	PM	CM	-	27,33666667
B	8	P2	PM	sag	-	24,76333333
B	8	P2	PM	CL	-	23,80666667
B	8	P3	AM	CM	-	25,06
B	8	P3	AM	sag	-	27,22666667
B	8	P3	AM	CL	-	30,79
B	8	P3	PM	CM	-	29,76
B	8	P3	PM	sag	-	28,40333333
B	8	P3	PM	CL	-	31,19333333
B	9	P2	AM	CM	-	27,53666667
B	9	P2	AM	sag	-	29,00333333
B	9	P2	AM	CL	-	24,34666667
B	9	P2	PM	CM	-	23,61
B	9	P2	PM	sag	-	30,16333333
B	9	P2	PM	CL	-	23,77333333
B	9	P3	AM	CM	-	26,72333333
B	9	P3	AM	sag	-	17,42333333
B	9	P3	AM	CL	-	23,61333333
B	9	P3	PM	CM	-	28,88666667
B	9	P3	PM	sag	-	29,49333333
B	9	P3	PM	CL	-	30,48666667
B	10	P2	AM	CM	-	25,77
B	10	P2	AM	sag	-	30,65
B	10	P2	AM	CL	-	26,76333333
B	10	P2	PM	CM	-	24,43
B	10	P2	PM	sag	-	25,21333333
B	10	P2	PM	CL	-	24,75333333
B	10	P3	AM	CM	-	30,91
B	10	P3	AM	sag	-	33,59
B	10	P3	AM	CL	-	38,73333333
B	10	P3	PM	CM	-	32,36333333
B	10	P3	PM	sag	-	27,59666667
B	10	P3	PM	CL	-	36,18666667
C	2	P2+P3	AM	CM	dors	3,63
C	2	P2+P3	AM	CM	centr	4,016666667
C	2	P2+P3	AM	CM	palm	3,603333333
C	2	P2+P3	AM	sag	dors	3,283333333
C	2	P2+P3	AM	sag	centr	3,256666667
C	2	P2+P3	AM	sag	palm	2,946666667
C	2	P2+P3	AM	CL	dors	3,836666667
C	2	P2+P3	AM	CL	centr	4,053333333
C	2	P2+P3	AM	CL	palm	4,306666667
C	2	P2+P3	PM	CM	dors	3,703333333
C	2	P2+P3	PM	CM	centr	4,793333333
C	2	P2+P3	PM	CM	palm	5,18
C	2	P2+P3	PM	sag	dors	2,88
C	2	P2+P3	PM	sag	centr	3,59
C	2	P2+P3	PM	sag	palm	4,963333333
C	2	P2+P3	PM	CL	dors	4,206666667
C	2	P2+P3	PM	CL	centr	5,226666667
C	2	P2+P3	PM	CL	palm	5,58
C	3	P2+P3	AM	CM	dors	3,006666667
C	3	P2+P3	AM	CM	centr	3,356666667
C	3	P2+P3	AM	CM	palm	3,25
C	3	P2+P3	AM	sag	dors	2,713333333
C	3	P2+P3	AM	sag	centr	3,27
C	3	P2+P3	AM	sag	palm	3,453333333
C	3	P2+P3	AM	CL	dors	2,896666667
C	3	P2+P3	AM	CL	centr	3,84
C	3	P2+P3	AM	CL	palm	3,97
C	3	P2+P3	PM	CM	dors	3,253333333
C	3	P2+P3	PM	CM	centr	4,316666667
C	3	P2+P3	PM	CM	palm	4,243333333
C	3	P2+P3	PM	sag	dors	2,57
C	3	P2+P3	PM	sag	centr	3,843333333
C	3	P2+P3	PM	sag	palm	4,383333333
C	3	P2+P3	PM	CL	dors	3,566666667
C	3	P2+P3	PM	CL	centr	4,67
C	3	P2+P3	PM	CL	palm	4,976666667
C	4	P2+P3	AM	CM	dors	3,433333333
C	4	P2+P3	AM	CM	centr	3,64
C	4	P2+P3	AM	CM	palm	3,52
C	4	P2+P3	AM	sag	dors	2,683333333
C	4	P2+P3	AM	sag	centr	3,2
C	4	P2+P3	AM	sag	palm	3,323333333
C	4	P2+P3	AM	CL	dors	3,143333333
C	4	P2+P3	AM	CL	centr	3,57
C	4	P2+P3	AM	CL	palm	3,986666667
C	4	P2+P3	PM	CM	dors	3,72
C	4	P2+P3	PM	CM	centr	4,28
C	4	P2+P3	PM	CM	palm	4,366666667
C	4	P2+P3	PM	sag	dors	3,133333333
C	4	P2+P3	PM	sag	centr	4,076666667
C	4	P2+P3	PM	sag	palm	4,15
C	4	P2+P3	PM	CL	dors	3,95
C	4	P2+P3	PM	CL	centr	4,293333333
C	4	P2+P3	PM	CL	palm	4,403333333
C	5	P2+P3	AM	CM	dors	3,176666667
C	5	P2+P3	AM	CM	centr	3,633333333
C	5	P2+P3	AM	CM	palm	3,453333333
C	5	P2+P3	AM	sag	dors	2,693333333
C	5	P2+P3	AM	sag	centr	2,876666667
C	5	P2+P3	AM	sag	palm	3,026666667
C	5	P2+P3	AM	CL	dors	3,4
C	5	P2+P3	AM	CL	centr	3,643333333
C	5	P2+P3	AM	CL	palm	3,64
C	5	P2+P3	PM	CM	dors	3,833333333
C	5	P2+P3	PM	CM	centr	4,596666667
C	5	P2+P3	PM	CM	palm	4,976666667
C	5	P2+P3	PM	sag	dors	2,963333333
C	5	P2+P3	PM	sag	centr	3,71
C	5	P2+P3	PM	sag	palm	3,91
C	5	P2+P3	PM	CL	dors	3,59
C	5	P2+P3	PM	CL	centr	4,603333333
C	5	P2+P3	PM	CL	palm	4,33
C	6	P2+P3	AM	CM	dors	2,99
C	6	P2+P3	AM	CM	centr	3,086666667
C	6	P2+P3	AM	CM	palm	3,493333333
C	6	P2+P3	AM	sag	dors	3,293333333
C	6	P2+P3	AM	sag	centr	3,13
C	6	P2+P3	AM	sag	palm	3,17
C	6	P2+P3	AM	CL	dors	3,76
C	6	P2+P3	AM	CL	centr	3,766666667
C	6	P2+P3	AM	CL	palm	3,6
C	6	P2+P3	PM	CM	dors	3,44
C	6	P2+P3	PM	CM	centr	4,12
C	6	P2+P3	PM	CM	palm	4,43
C	6	P2+P3	PM	sag	dors	2,53
C	6	P2+P3	PM	sag	centr	3,42
C	6	P2+P3	PM	sag	palm	3,94
C	6	P2+P3	PM	CL	dors	3,603333333
C	6	P2+P3	PM	CL	centr	4,316666667
C	6	P2+P3	PM	CL	palm	4,77
C	7	P2+P3	AM	CM	dors	2,45
C	7	P2+P3	AM	CM	centr	2,693333333
C	7	P2+P3	AM	CM	palm	2,776666667
C	7	P2+P3	AM	sag	dors	2,696666667
C	7	P2+P3	AM	sag	centr	2,27
C	7	P2+P3	AM	sag	palm	3,063333333
C	7	P2+P3	AM	CL	dors	2,373333333
C	7	P2+P3	AM	CL	centr	3,243333333
C	7	P2+P3	AM	CL	palm	3,686666667
C	7	P2+P3	PM	CM	dors	2,583333333
C	7	P2+P3	PM	CM	centr	3,106666667
C	7	P2+P3	PM	CM	palm	3,56
C	7	P2+P3	PM	sag	dors	2,573333333
C	7	P2+P3	PM	sag	centr	2,61
C	7	P2+P3	PM	sag	palm	3,36
C	7	P2+P3	PM	CL	dors	2,74
C	7	P2+P3	PM	CL	centr	3,473333333
C	7	P2+P3	PM	CL	palm	4,076666667
C	8	P2+P3	AM	CM	dors	2,48
C	8	P2+P3	AM	CM	centr	2,663333333
C	8	P2+P3	AM	CM	palm	2,92
C	8	P2+P3	AM	sag	dors	2,806666667
C	8	P2+P3	AM	sag	centr	2,636666667
C	8	P2+P3	AM	sag	palm	2,93
C	8	P2+P3	AM	CL	dors	3,186666667
C	8	P2+P3	AM	CL	centr	3,473333333
C	8	P2+P3	AM	CL	palm	3,576666667
C	8	P2+P3	PM	CM	dors	2,796666667
C	8	P2+P3	PM	CM	centr	3,353333333
C	8	P2+P3	PM	CM	palm	3,78
C	8	P2+P3	PM	sag	dors	3,073333333
C	8	P2+P3	PM	sag	centr	2,743333333
C	8	P2+P3	PM	sag	palm	3,583333333
C	8	P2+P3	PM	CL	dors	3,03
C	8	P2+P3	PM	CL	centr	3,706666667
C	8	P2+P3	PM	CL	palm	4,176666667
C	9	P2+P3	AM	CM	dors	2,273333333
C	9	P2+P3	AM	CM	centr	2,71
C	9	P2+P3	AM	CM	palm	2,906666667
C	9	P2+P3	AM	sag	dors	1,75
C	9	P2+P3	AM	sag	centr	2,443333333
C	9	P2+P3	AM	sag	palm	2,776666667
C	9	P2+P3	AM	CL	dors	2,623333333
C	9	P2+P3	AM	CL	centr	2,87
C	9	P2+P3	AM	CL	palm	3,02
C	9	P2+P3	PM	CM	dors	2,81
C	9	P2+P3	PM	CM	centr	3,37
C	9	P2+P3	PM	CM	palm	3,916666667
C	9	P2+P3	PM	sag	dors	1,89
C	9	P2+P3	PM	sag	centr	3,116666667
C	9	P2+P3	PM	sag	palm	3,55
C	9	P2+P3	PM	CL	dors	2,49
C	9	P2+P3	PM	CL	centr	3,66
C	9	P2+P3	PM	CL	palm	3,73
C	10	P2+P3	AM	CM	dors	2,733333333
C	10	P2+P3	AM	CM	centr	2,953333333
C	10	P2+P3	AM	CM	palm	2,72
C	10	P2+P3	AM	sag	dors	2,733333333
C	10	P2+P3	AM	sag	centr	2,896666667
C	10	P2+P3	AM	sag	palm	2,973333333
C	10	P2+P3	AM	CL	dors	2,163333333
C	10	P2+P3	AM	CL	centr	3,546666667
C	10	P2+P3	AM	CL	palm	4,233333333
C	10	P2+P3	PM	CM	dors	2,623333333
C	10	P2+P3	PM	CM	centr	3,086666667
C	10	P2+P3	PM	CM	palm	3,606666667
C	10	P2+P3	PM	sag	dors	1,88
C	10	P2+P3	PM	sag	centr	3,08
C	10	P2+P3	PM	sag	palm	3,376666667
C	10	P2+P3	PM	CL	dors	2,8
C	10	P2+P3	PM	CL	centr	3,9
C	10	P2+P3	PM	CL	palm	3,996666667
D	2	P2+P3	AM	CM	-	98,57
D	2	P2+P3	AM	sag	-	79,16
D	2	P2+P3	AM	CL	-	100,2566667
D	2	P2+P3	PM	CM	-	120,4733333
D	2	P2+P3	PM	sag	-	100,3766667
D	2	P2+P3	PM	CL	-	126,39
D	3	P2+P3	AM	CM	-	77,70666667
D	3	P2+P3	AM	sag	-	72,41666667
D	3	P2+P3	AM	CL	-	96,99666667
D	3	P2+P3	PM	CM	-	99,50666667
D	3	P2+P3	PM	sag	-	82,49333333
D	3	P2+P3	PM	CL	-	102,1566667
D	4	P2+P3	AM	CM	-	91,44
D	4	P2+P3	AM	sag	-	73,63666667
D	4	P2+P3	AM	CL	-	91,15333333
D	4	P2+P3	PM	CM	-	106,88
D	4	P2+P3	PM	sag	-	88,95333333
D	4	P2+P3	PM	CL	-	92
D	5	P2+P3	AM	CM	-	73,38666667
D	5	P2+P3	AM	sag	-	64,12333333
D	5	P2+P3	AM	CL	-	87,95
D	5	P2+P3	PM	CM	-	104,25
D	5	P2+P3	PM	sag	-	79,88333333
D	5	P2+P3	PM	CL	-	101,6833333
D	6	P2+P3	AM	CM	-	74,11666667
D	6	P2+P3	AM	sag	-	69,5
D	6	P2+P3	AM	CL	-	77,33333333
D	6	P2+P3	PM	CM	-	95,11666667
D	6	P2+P3	PM	sag	-	79,49333333
D	6	P2+P3	PM	CL	-	96,19666667
D	7	P2+P3	AM	CM	-	53,97
D	7	P2+P3	AM	sag	-	56,65333333
D	7	P2+P3	AM	CL	-	66,39
D	7	P2+P3	PM	CM	-	68,33666667
D	7	P2+P3	PM	sag	-	60,54666667
D	7	P2+P3	PM	CL	-	73,55666667
D	8	P2+P3	AM	CM	-	58,82
D	8	P2+P3	AM	sag	-	63,96666667
D	8	P2+P3	AM	CL	-	79,36
D	8	P2+P3	PM	CM	-	72,60333333
D	8	P2+P3	PM	sag	-	65,80333333
D	8	P2+P3	PM	CL	-	78,73666667
D	9	P2+P3	AM	CM	-	61,49
D	9	P2+P3	AM	sag	-	57,87
D	9	P2+P3	AM	CL	-	67,14333333
D	9	P2+P3	PM	CM	-	74,78666667
D	9	P2+P3	PM	sag	-	71,11333333
D	9	P2+P3	PM	CL	-	76,33666667
D	10	P2+P3	AM	CM	-	62,34666667
D	10	P2+P3	AM	sag	-	67,68333333
D	10	P2+P3	AM	CL	-	73,74333333
D	10	P2+P3	PM	CM	-	69,25333333
D	10	P2+P3	PM	sag	-	62,57666667
D	10	P2+P3	PM	CL	-	85,51666667
